# Supplementary material
Source: PubMed Central journal article supplement (PMC6916481)
Supplement: supp_RA119.010686_155272_1_supp_424959_q0k3cn.pdf [file supp_RA119.010686_155272_1_supp_424959_q0k3cn.pdf]

Supporting information to

Non-competitive binding of PpiD and YidC to the SecYEG translocon expands the global view on the SecYEG interactome in *E. coli*

**Benjamin Jauß<sup>1#</sup>, Narcis-Adrian Petriman<sup>1,2,#</sup>, Friedel Drepper<sup>2,3,4</sup>, Lisa Franz<sup>1</sup>, Ilie Sachelaru<sup>1</sup>, Thomas Welte<sup>1</sup>, Ruth Steinberg<sup>1</sup>, Bettina Warscheid<sup>2,3,4</sup> and Hans-Georg Koch<sup>1\*</sup>**

<sup>1</sup>Institute of Biochemistry and Molecular Biology, ZBMZ, Faculty of Medicine, <sup>2</sup>Faculty of Biology, <sup>3</sup>Institute of Biology II, Biochemistry and Functional Proteomics, Faculty of Biology, <sup>4</sup>Signalling Research Centres BIOSS and CIBSS, Albert-Ludwigs-University Freiburg, 79104 Freiburg, Germany

**File content:**

**Table S1** (separate data file): Complete list of putative SecYEG interacting proteins identified by label free proteomics.

**Table S2:** List of oligonucleotides used for PCR reactions

**Figure S1:** Significant interactors of the SecYEG in *E. coli*.

**Figure S2:** PpiD antibodies recognize both PpiD and YfgM

**Table S1 (separate Data file) : Complete List of putative SecYEG interacting proteins identified by label-free proteomics with and without DSS-cross-linking.** When indicated, YidC was co-expressed with SecY<sub>His</sub>EG.

**Table S2: List of oligonucleotides used for PCR reactions.**

| Primer name           | 5' – oligonucleotides – 3'              | Purpose of use                                  |
|-----------------------|-----------------------------------------|-------------------------------------------------|
| SecY_plug_removal_for | GCTCTCAGCCGTGCTTCTATCTTTGCTC            | Removal of SecY plug domain                     |
| SecY_plug_removal_rev | GATGGTGCCTCGCTGTTGCTCAAGC               |                                                 |
| YidC_cutpBadlong_for  | CGCGATCTAGAGGGCTAGCAGGAGGAATTCAC        | Cloning of pTrc99a-SecY <sub>His</sub> EG-YidC  |
| YidC_cutpBadlong_rev  | CGGTCGTCGACTCAGGATTTTTTCTTCTCGCG        |                                                 |
| YidC_HiR10_for        | GGCAGCGGAGATTCGC                        | Cloning of pTrc99a-SecY <sub>His</sub> EG-YidC  |
| YidC_HiR10_rev        | CATCGTTAGTGTTCTCCATGGTG                 |                                                 |
| SecY_I61_for          | ACCATCTAGGAGATGTTAAC                    | Construction of SeY plug (61-70) - pBpA mutants |
| SecY_I61_rev          | GCCTCGCTGTTGCTC                         |                                                 |
| SecY_E62_for          | CGAGGCACCATCATTTAGATGTTTAAACATGTTTC     |                                                 |
| SecY_E62_rev          | GAACATGTAAACATCTAAATGATGGTGCCTCG        |                                                 |
| SecY_M63_for          | GAGGCACCATCATTGAGTAGTTTAAACATGTTCTCTGGG |                                                 |
| SecY_M63_rev          | CCAGAGAACATGTAAACTACTCAATGATGGTGCCTC    |                                                 |
| SecY_F64_for          | CACCATCATTGAGATGTAGAACATGTTCTCTGGTG     |                                                 |
| SecY_F64_rev          | CACCAGAGAACATGTTCTACATCTCAATGATGGTG     |                                                 |
| SecY_N65_for          | CATCATTGAGATGTTTTAGATGTTCTCTGGTGGTG     |                                                 |
| SecY_N65_rev          | CACCACCAGAGAACATCTAAAACATCTCAATGATG     |                                                 |
| SecY_M66_for          | CATTGAGATGTTAACTAGTTCTCTGGTGGTGCTC      |                                                 |
| SecY_M66_rev          | GAGCACCACCAGAGAACTAGTTAAACATCTCAATG     |                                                 |
| SecY_F67_for          | AACATGTAGTCTGGTGGTGCT                   |                                                 |
| SecY_F67_rev          | AAACATCTCAATGATGGTGCC                   |                                                 |
| SecY_S68_for          | GATGTTTAAACATGTTCTAGGGTGGTGCTCTCAGCC    |                                                 |
| SecY_S68_rev          | GGCTGAGAGCACCACCCTAGAACATGTTAAACATC     |                                                 |
| SecY_G69_for          | GTTTAAACATGTTCTCTTAGGGTGGTGCTCTCAGCCGTG |                                                 |
| SecY_G69_rev          | CACGGCTGAGAGCACCCTAAGAGAACATGTTAAAC     |                                                 |
| SecY_G70_for          | CATGTTCTCTGGTTAGGCTCTCAGCCGTG           |                                                 |
| SecY_G70_rev          | CACGGCTGAGAGCCTAACCAGAGAACATG           |                                                 |



| MC4100<br>(wt) | $\Delta ppiD$ | $\Delta yfgM$ | $\Delta ppiD/yfgM$ |
|----------------|---------------|---------------|--------------------|
|----------------|---------------|---------------|--------------------|

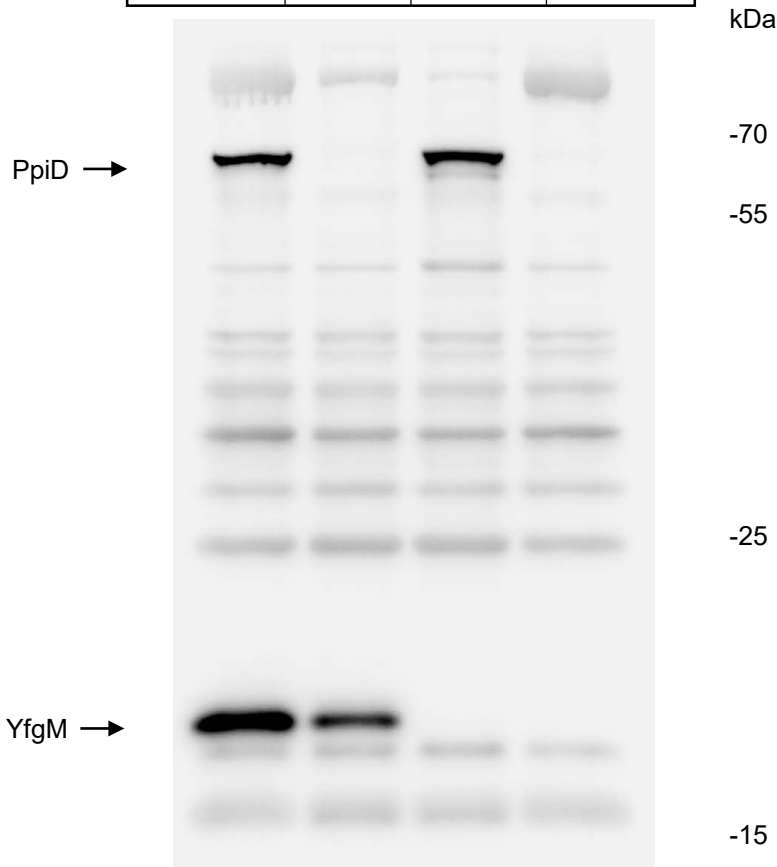

**Supporting Figure 2: PpiD antibodies recognize both PpiD and YfgM.** Cells of the indicated *E. coli* strains were TCA precipitated and after SDS-PAGE/Western-blotting decorated with  $\alpha$ -PpiD antibodies. Indicated are PpiD and YfgM and the corresponding gel areas are identical to those displayed in Fig. 5F
